# Supplementary material
Source: PubMed Central journal article supplement (PMC3101862)
Supplement: supp_M110.001008_mcp.M110.001008-1.pdf [file supp_M110.001008_mcp.M110.001008-1.pdf]

**Supplemental Table S1a: proteins found over-expressed with both instruments (A: LTQ-OT MS, B: MALDI TOF-TOF)**

| DB entry | Description                                                |   | # Unique peptides | # Pept. matches | # Peptides quantifiable | Ratio | SD   | CV (%) |
|----------|------------------------------------------------------------|---|-------------------|-----------------|-------------------------|-------|------|--------|
| P04217   | Alpha-1B-glycoprotein                                      | A | 5                 | 38              | 14                      | 2.06  | 0.17 | 8.37   |
|          |                                                            | B | 6                 | 9               | 7                       | 1.99  | 0.19 | 9.80   |
| P02750   | Leucine-rich alpha-2-glycoprotein (LRG)                    | A | 3                 | 11              | 11                      | 2.64  | 1.22 | 46.29  |
|          |                                                            | B | 4                 | 4               | 4                       | 1.76  | 0.54 | 30.56  |
| P43652   | Afamin (Alpha-Alb)                                         | A | 4                 | 9               | 5                       | 2.72  | 0.21 | 7.91   |
|          |                                                            | B | 4                 | 4               | 4                       | 2.00  | 0.35 | 17.71  |
| P01008   | Antithrombin-III (ATIII)                                   | A | 12                | 69              | 46                      | 2.00  | 0.16 | 8.12   |
|          |                                                            | B | 10                | 16              | 15                      | 2.04  | 0.27 | 13.05  |
| P06727   | Apolipoprotein A-IV (Apo-AIV) (ApoA-IV)                    | A | 15                | 48              | 33                      | 2.14  | 0.27 | 12.70  |
|          |                                                            | B | 14                | 18              | 13                      | 2.13  | 0.13 | 6.32   |
| P61769   | Beta-2-microglobulin form pI 5.3                           | A | 3                 | 36              | 11                      | 6.33  | 1.78 | 28.21  |
|          |                                                            | B | 3                 | 4               | 3                       | 4.90  | 1.98 | 40.37  |
| P02745   | Complement C1q subcomponent subunit A                      | A | 3                 | 12              | 10                      | 5.51  | 0.47 | 8.52   |
|          |                                                            | B | 2                 | 2               | 2                       | 3.52  | 2.56 | 72.75  |
| P08571   | Monocyte differentiation antigen CD14,                     | A | 4                 | 23              | 14                      | 3.85  | 0.80 | 20.77  |
|          |                                                            | B | 4                 | 4               | 4                       | 4.02  | 0.69 | 17.10  |
| P00450   | Ceruleplasmin                                              | A | 16                | 133             | 73                      | 1.92  | 0.26 | 13.39  |
|          |                                                            | B | 24                | 42              | 40                      | 1.99  | 0.27 | 13.40  |
| P00751   | Complement factor B Bb fragment                            | A | 11                | 36              | 28                      | 1.81  | 0.24 | 13.20  |
|          |                                                            | B | 12                | 13              | 11                      | 1.82  | 0.11 | 5.87   |
| P08603   | Complement factor H                                        | A | 11                | 43              | 27                      | 1.93  | 0.22 | 11.19  |
|          |                                                            | B | 14                | 14              | 13                      | 1.97  | 0.30 | 15.18  |
| P36222   | Chitinase-3-like protein 1 (CGP-39) (GP-39)                | A | 4                 | 9               | 5                       | 2.73  | 1.03 | 37.71  |
|          |                                                            | B | 7                 | 9               | 9                       | 4.25  | 1.21 | 28.39  |
| P06681   | Complement C2a fragment                                    | A | 7                 | 34              | 26                      | 4.84  | 1.48 | 30.53  |
|          |                                                            | B | 3                 | 6               | 6                       | 2.79  | 1.44 | 51.68  |
| P01024   | Complement C3c alpha' chain fragment 2                     | A | 23                | 78              | 56                      | 2.89  | 0.65 | 22.53  |
|          |                                                            | B | 16                | 17              | 15                      | 2.56  | 0.41 | 15.94  |
| P10643   | Complement component C7                                    | A | 9                 | 20              | 8                       | 2.19  | 0.33 | 15.13  |
|          |                                                            | B | 8                 | 9               | 6                       | 2.55  | 0.11 | 4.23   |
| P08637   | Low affinity immunoglobulin gamma Fc region receptor III-A | A | 3                 | 9               | 7                       | 5.06  | 0.83 | 16.31  |
|          |                                                            | B | 2                 | 2               | 2                       | 3.25  | 0.61 | 18.81  |
| Q9Y6R7   | IgGFc-binding protein (FcgammaBP)                          | A | 21                | 99              | 74                      | 9.13  | 4.33 | 47.47  |
|          |                                                            | B | 24                | 39              | 31                      | 4.80  | 2.14 | 44.55  |
| P02765   | Alpha-2-HS-glycoprotein chain A                            | A | 4                 | 15              | 14                      | 4.35  | 1.62 | 37.17  |
|          |                                                            | B | 5                 | 6               | 6                       | 4.29  | 1.60 | 37.28  |
| P02751   | Ugl-Y3 [ISOFORM 14]                                        | A | 6                 | 23              | 15                      | 1.93  | 0.27 | 14.00  |
|          |                                                            | B | 8                 | 9               | 7                       | 2.08  | 0.09 | 4.41   |
| P05155   | Plasma protease C1 inhibitor (C1 Inh)                      | A | 9                 | 66              | 55                      | 2.15  | 0.55 | 25.44  |
|          |                                                            | B | 6                 | 8               | 7                       | 2.24  | 0.33 | 14.84  |
| P01871   | Ig mu chain C region                                       | A | 11                | 104             | 8                       | 3.41  | 1.49 | 43.59  |
|          |                                                            | B | 14                | 25              | 15                      | 7.46  | 4.65 | 62.31  |
| P01834   | Ig kappa chain C region                                    | A | 6                 | 27              | 1                       | 16.96 | n/a  | n/a    |
|          |                                                            | B | 4                 | 6               | 2                       | 11.48 | 2.36 | 20.60  |
| P19823   | Inter-alpha-trypsin inhibitor heavy chain H2               | A | 2                 | 4               | 1                       | 2.59  | n/a  | n/a    |
|          |                                                            | B | 2                 | 2               | 2                       | 2.26  | 0.08 | 3.44   |
| P01042   | Low molecular weight growth-promoting factor               | A | 7                 | 17              | 12                      | 1.87  | 0.23 | 12.40  |
|          |                                                            | B | 5                 | 8               | 7                       | 2.26  | 0.22 | 9.73   |
| P51884   | Lumican (KSPG lumican)                                     | A | 5                 | 13              | 11                      | 1.83  | 0.37 | 20.15  |
|          |                                                            | B | 3                 | 4               | 4                       | 1.73  | 0.12 | 7.10   |
| Q96PD5   | N-acetylmuramoyl-L-alanine amidase                         | A | 2                 | 4               | 1                       | 2.20  | n/a  | n/a    |
|          |                                                            | B | 2                 | 2               | 2                       | 2.78  | 0.22 | 7.94   |
| P00747   | Plasmin light chain B                                      | A | 6                 | 14              | 10                      | 2.31  | 0.52 | 22.34  |
|          |                                                            | B | 8                 | 9               | 9                       | 2.28  | 0.44 | 19.21  |
| P05543   | Thyroxine-binding globulin                                 | A | 2                 | 9               | 8                       | 2.43  | 0.33 | 13.43  |
|          |                                                            | B | 2                 | 2               | 2                       | 2.29  | 0.13 | 5.63   |
| P25311   | Zinc-alpha-2-glycoprotein (Zn-alpha-2-GP)                  | A | 3                 | 4               | 4                       | 1.82  | 0.24 | 13.02  |
|          |                                                            | B | 3                 | 3               | 3                       | 2.25  | 0.22 | 10.02  |

**Supplemental Table S1b: proteins found over-expressed with LTQ-OT MS**

| <b>DB entry</b> | <b>Description</b>                                   | <b># Unique peptides</b> | <b># Pept. matches</b> | <b># Peptides quantifiable</b> | <b>Ratio</b> | <b>SD</b> | <b>CV (%)</b> |
|-----------------|------------------------------------------------------|--------------------------|------------------------|--------------------------------|--------------|-----------|---------------|
| P02647          | Apolipoprotein A-I(1-242)                            | 3                        | 10                     | 6                              | 2.99         | 0.29      | 9.62          |
| P00734          | Thrombin heavy chain                                 | 3                        | 8                      | 5                              | 2.54         | 0.41      | 16.22         |
| O00584          | Ribonuclease T2                                      | 3                        | 6                      | 6                              | 2.33         | 0.32      | 13.86         |
| Q9Y279          | V-set and immunoglobulin domain-containing protein 4 | 2                        | 3                      | 2                              | 2.20         | 0.49      | 22.43         |
| P02652          | Apolipoprotein A-II(1-76)                            | 4                        | 9                      | 5                              | 2.18         | 0.28      | 13.00         |
| P05156          | Complement factor I light chain                      | 3                        | 11                     | 10                             | 2.00         | 0.24      | 11.77         |
| P55058          | Phospholipid transfer protein                        | 2                        | 6                      | 5                              | 1.83         | 0.08      | 4.40          |
| P09871          | Complement C1s subcomponent light chain              | 3                        | 6                      | 4                              | 1.80         | 0.58      | 32.07         |

**Supplemental Table S1c: proteins found over-expressed with MALDI TOF-TOF MS**

| DB entry | Description                                                                            | # Unique peptides | # Pept. matches | # Peptides quantifiable | Ratio | SD   | CV (%) |
|----------|----------------------------------------------------------------------------------------|-------------------|-----------------|-------------------------|-------|------|--------|
| P02765   | Alpha-2-HS-glycoprotein                                                                | 5                 | 5               | 5                       | 4.05  | 1.58 | 38.93  |
| P10451   | Osteopontin (SPP-1)                                                                    | 2                 | 2               | 2                       | 3.64  | 0.28 | 7.70   |
| P04196   | Histidine-rich glycoprotein (HPRG)                                                     | 3                 | 5               | 5                       | 2.68  | 0.49 | 18.20  |
| P00734   | Prothrombin                                                                            | 6                 | 6               | 6                       | 2.54  | 0.66 | 26.09  |
| P63267   | Actin, gamma-enteric smooth muscle                                                     | 2                 | 2               | 2                       | 2.44  | 0.00 | 0.08   |
| P62988   | Ubiquitin                                                                              | 2                 | 2               | 2                       | 2.27  | 0.26 | 11.34  |
| P02766   | Transthyretin                                                                          | 2                 | 3               | 3                       | 2.20  | 0.11 | 4.94   |
| P01011   | Alpha-1-antichymotrypsin His-Pro-less                                                  | 7                 | 9               | 9                       | 2.11  | 0.72 | 34.05  |
| P05156   | Complement factor I                                                                    | 3                 | 3               | 3                       | 1.99  | 0.24 | 11.87  |
| P08253   | 72 kDa type IV collagenase (MMP-2)                                                     | 2                 | 2               | 2                       | 1.92  | 0.06 | 2.87   |
| Q08380   | Galectin-3-binding protein (Mac-2 BP) (MAC2BP)                                         | 2                 | 4               | 4                       | 1.90  | 0.34 | 17.64  |
| P98160   | Basement membrane-specific heparan sulfate proteoglycan core protein (HSPG) (PLC)      | 2                 | 2               | 2                       | 1.84  | 0.16 | 8.81   |
| Q15113   | Procollagen C-endopeptidase enhancer 1                                                 | 4                 | 4               | 4                       | 1.84  | 0.32 | 17.61  |
| P61626   | Lysozyme C                                                                             | 2                 | 4               | 4                       | 1.80  | 0.85 | 47.37  |
| P07333   | Macrophage colony-stimulating factor 1 receptor                                        | 2                 | 2               | 2                       | 1.79  | 0.16 | 8.75   |
| Q02246   | Contactin-2 (TAX-1)                                                                    | 2                 | 2               | 2                       | 1.78  | 0.49 | 27.27  |
| P02749   | Beta-2-glycoprotein 1 (Beta(2)GPI) (B2GPI) (Apo-H)                                     | 3                 | 5               | 5                       | 1.77  | 0.26 | 14.99  |
| Q24JP5   | Transmembrane protein 132A                                                             | 3                 | 3               | 3                       | 1.76  | 0.26 | 14.59  |
| P24592   | Insulin-like growth factor-binding protein 6 (IGF-binding protein 6) (IGFBP-6) (IBP-6) | 2                 | 4               | 4                       | 1.69  | 0.19 | 11.30  |
| P02774   | Vitamin D-binding protein (DBP) (VDB)                                                  | 14                | 18              | 15                      | 1.68  | 0.20 | 11.89  |
| P08697   | Alpha-2-antiplasmin (Alpha-2-AP) (Alpha-2-PI)                                          | 3                 | 5               | 5                       | 1.67  | 0.19 | 11.43  |
| P16870   | Carboxypeptidase E (CPE) (CPH)                                                         | 2                 | 2               | 2                       | 1.66  | 0.65 | 39.08  |

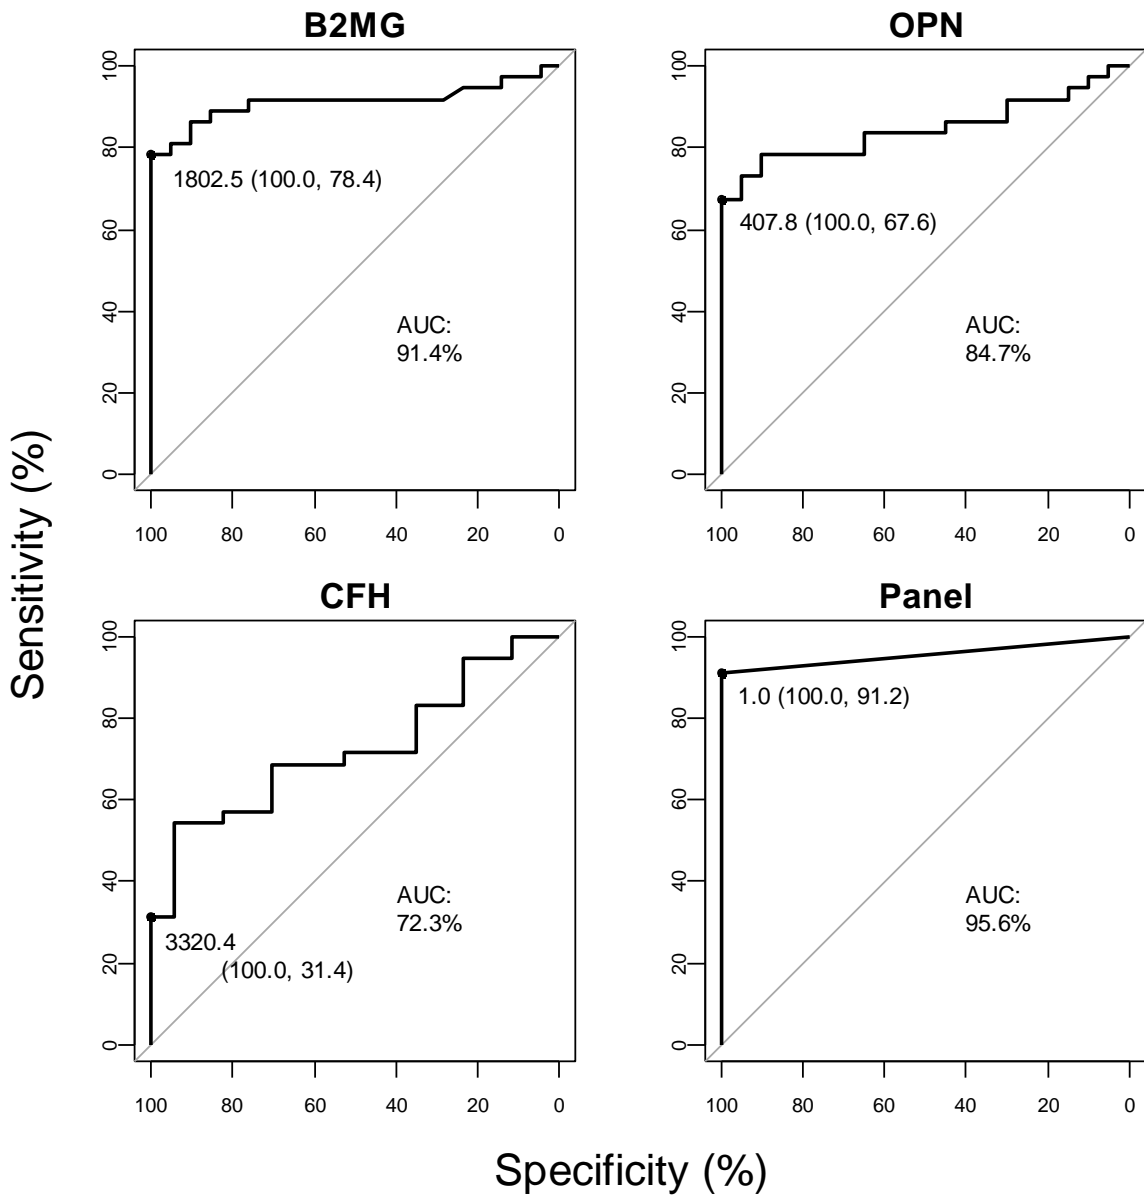

**Supplemental Figure S1: ROC curves for B2MG, OPN, CFH, and the panel composed of B2MG and OPN**

Cut-off values for each molecule [ng/ml] and for the panel are reported as a point with the corresponding numeric value on each ROC curve. Percentage sensitivity set for 100% specificity is reported in brackets on each graph. Area under the ROC curve (AUC) is also given.

**Supplemental Table S2: Detailed results for the three molecules tested in respect with the stage of the disease**

| Markers     | Stage 1 <sup>a</sup> | Stage 2 <sup>b</sup> | Mann-Whitney U test | Correlation with WBC | ROC curve |                 |                                      |
|-------------|----------------------|----------------------|---------------------|----------------------|-----------|-----------------|--------------------------------------|
|             | Median (range)       | Median (range)       | p value             | Spearman rho         | % AUC     | Cut-off [ng/ml] | Sensitivity, % (95% CI) <sup>c</sup> |
| <b>B2MG</b> | 670 (90 – 1690)      | 3690 (160 – 15400)   | < 0.0001            | 0.725                | 92        | > 1805          | 78 (62 – 90)                         |
| <b>OPN</b>  | 179.3 (12.7 – 378.8) | 686.1 (13.9 – 4336)  | < 0.0001            | 0.723                | 85        | > 407.9         | 68 (50 – 82)                         |
| <b>CFH</b>  | 1662 (210.2 – 3215)  | 2505 (305.7 – 15830) | 0.0101              | 0.562                | 73        | > 3320          | 31 (17 – 49)                         |

<sup>a</sup> Stage 1: Absence of parasite and  $\leq 5$  WBC/ $\mu$ l in CSF.

<sup>b</sup> Stage 2: Presence of parasite and/or  $>5$  WBC/ $\mu$ l in CSF.

<sup>c</sup> Sensitivity was set for a specificity of 100% (95% CI, 84-100).
